# Supplementary material
Source: Springer Nature journal article supplement (https://www.springermedizin.de/resource/supplementary/13018_2010_237_MOESM3_ESM.pdf/9636636)

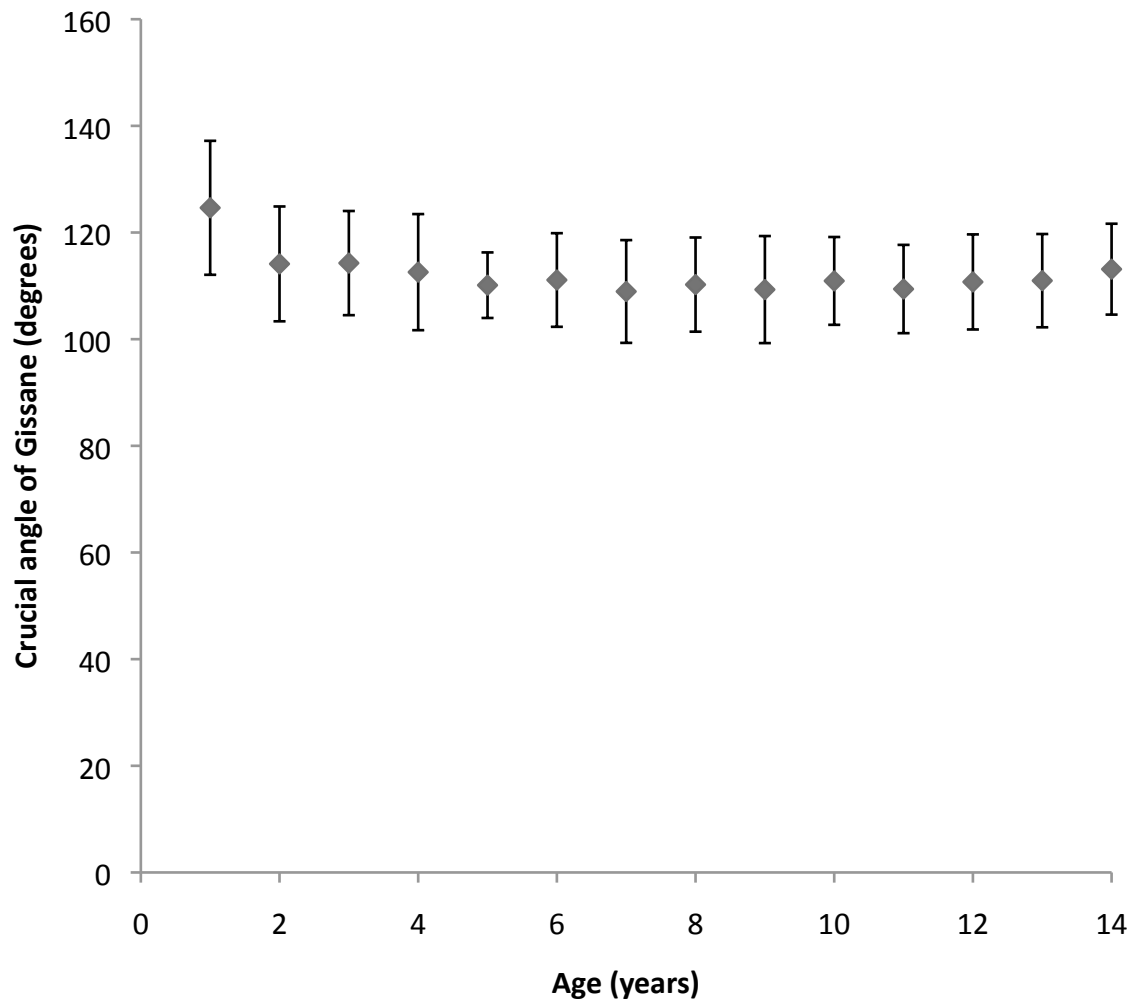

Supplement: MOESM3 [file 9636636]
